# Supplementary material for: Preclinical Evaluation of Invariant Natural Killer T Cells Modified with CD38 or BCMA Chimeric Antigen Receptors for Multiple Myeloma
Source: PubMed Central journal article supplement (PMC7865760; doi:10.3390/ijms22031096), 2021-01-22
Supplement: ijms-22-01096-s001.pdf [file ijms-22-01096-s001.pdf]

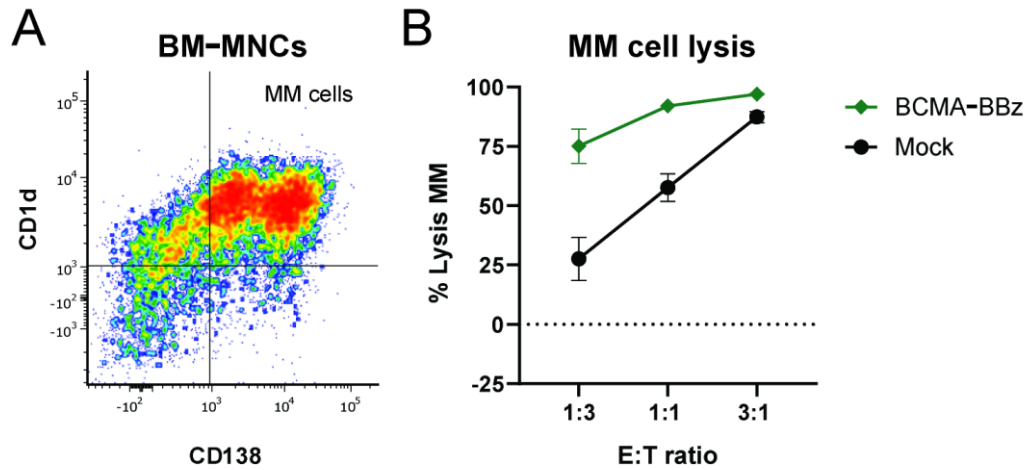

**Figure S1.** Cytotoxic activity of BCMA-CAR and Mock transduced iNKT cells against CD1d<sup>+</sup> primary MM cells. **(a)** Density plot depicting the expression of CD1d and CD138, upper right quadrant represent the plasma cells. **(b)** Graph demonstrates lysis the of CD38<sup>+</sup>CD138<sup>+</sup> MM cells by BCMA-BBz CAR iNKT cells or Mock transduced iNKT cells after 16 hour co-incubation. Note the high levels of lysis by Mock transduced iNKT cells at high E:T ratios, which is probably mediated via the endogenous TCR.
